# Supplementary material for: Gene Expression Responses to FUS, EWS, and TAF15 Reduction and Stress Granule Sequestration Analyses Identifies FET-Protein Non-Redundant Functions
Source: PubMed Central journal article supplement (PMC3457980; doi:10.1371/journal.pone.0046251), 2012-09-25
Supplement: pone.0046251.s001.pdf [file pone.0046251.s001.pdf]

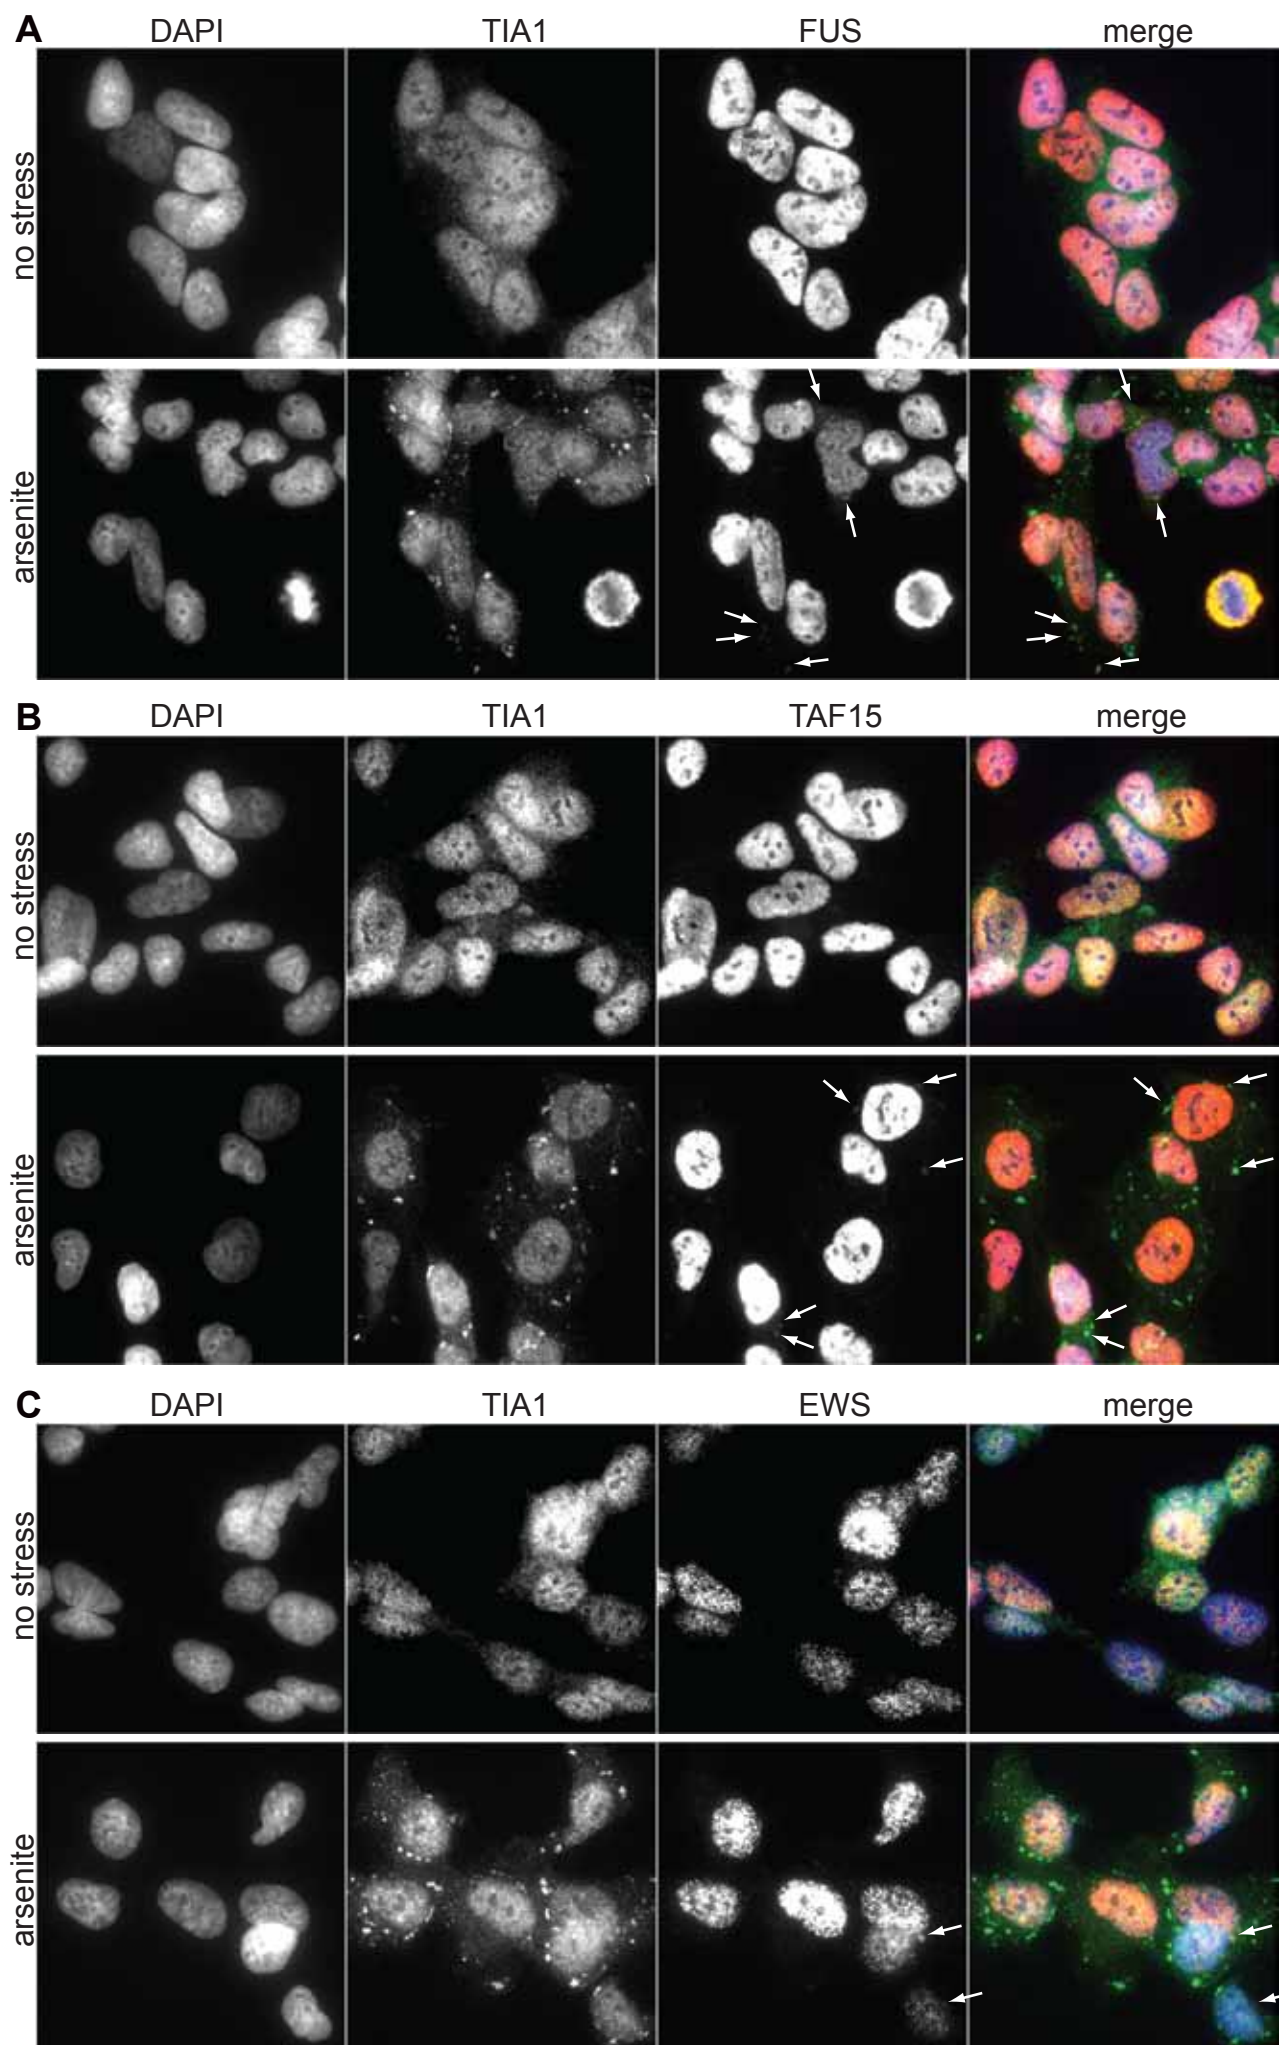

Figure S1
