# Supplementary material for: Gene Expression Responses to FUS, EWS, and TAF15 Reduction and Stress Granule Sequestration Analyses Identifies FET-Protein Non-Redundant Functions
Source: PLoS One. 2012 Sep 25;7(9):e46251. doi: 10.1371/journal.pone.0046251 (PMC3457980; doi:10.1371/journal.pone.0046251)
Supplement: Table S9 — IPA category neurological disease. Pathway analysis by IPA of DEGs in HEK293-cells after siRNA mediated gene knock-down of the FUS, EWS, TAF15, or FUS+EWS+TAF15 proteins. The category Neurological Disease of the Bio Functions analysis belonging to each siRNA group is listed. (XLSX) [file pone.0046251.s016.xlsx]

## Sheet: Ark1
IPA category Neurological Disease
siFUS
Category	Functions Annotation	p-value	Molecules	# Molecules
Neurological Disease	cerebral amyloid angiopathy	0.000946	ACTA2, AGER, APP	3
Neurological Disease	familial Alzheimer's disease	0.00789	ACTA2, APP	2
Neurological Disease	Alzheimer's disease of humans	0.00939	AGER, APP	2
Neurological Disease	dystrophy of cholinergic fibers	0.0125	APP	1
Neurological Disease	kindling of mice	0.0125	FOS	1
Neurological Disease	neuritic dystrophy of hippocampal neurons	0.0125	APP	1
Neurological Disease	peroxisomal acyl CoA oxidase deficiency	0.0125	ACOX1	1
Neurological Disease	size of amyloid-beta plaques	0.0125	APP	1
Neurological Disease	solubilization of amyloid-beta plaques	0.0125	APP	1
Neurological Disease	familial hemiplegic migraine	0.0127	PDE5A, PDE7B	2
Neurological Disease	vertigo	0.0186	CA14, PDE5A	2
Neurological Disease	Usher syndrome type 1D	0.0248	CDH23	1
siEWS
Category	Functions Annotation	p-value	Molecules	# Molecules
Neurological Disease	neurological disorder	1.88e-06	ACTL6B, ANXA2, AP3B2, APP, ASNS, ATP4A, ATP6V1G2, BAX, BCL2, BRE, BSN, C5ORF13, CA8, CAV1, CD2BP2, CERK, CHGA, CHGB, CLDN14, CPLX1, CPNE9, CREB5, CRMP1, CUL3, CXCL12, DDIT3, DTNBP1 (includes EG:84062), DUSP4, EGR1, EHMT1, EPHA3, ERBB3, ETV4, ETV5, EWSR1, FDXR, FLJ35282, FOS, FOSB, GABBR2, GADD45A, GAL3ST1, GARNL3, GNG2, GNG4, GRIN1, HLA-DOA, HSP90AA1, ID4, JUNB, KCNB1, KCNQ2, KHSRP, KIAA1274, LAR…	111
Neurological Disease	schizophrenia	4.21e-05	APP, C5ORF13, CAV1, CERK, CHGB, CPLX1, CXCL12, DTNBP1 (includes EG:84062), ERBB3, EWSR1, GNG2, GRIN1, NEFM, NELL2, OLFM1, PIK3R1, PTGS2, PVALB, SEPP1, SLC1A4, SLC7A11, STMN2, SYN2, SYP, UBE2V2	25
Neurological Disease	dyskinesia	5.9e-05	BAX, BCL2, C5ORF13, CHGB, DDIT3, EGR1, ETV4, ETV5, FOS, FOSB, GADD45A, GRIN1, HSP90AA1, ID4, JUNB, KCNQ2, METTL9 (includes EG:51108), MYOM2, NBEA (includes EG:26960), PCTP, PSMB9, PVALB, RCAN1, RDH12, RFX4, SCAMP5, SLC1A4, TGM2	28
Neurological Disease	Huntington's disease	9.04e-05	BAX, BCL2, C5ORF13, CHGB, DDIT3, EGR1, ETV4, ETV5, FOS, GADD45A, GRIN1, HSP90AA1, ID4, JUNB, KCNQ2, METTL9 (includes EG:51108), MYOM2, NBEA (includes EG:26960), PCTP, PSMB9, PVALB, RCAN1, RDH12, RFX4, SCAMP5, SLC1A4, TGM2	27
Neurological Disease	amyotrophic lateral sclerosis of mice	0.000675	BCL2, NEFM, PVALB	3
Neurological Disease	neurodegeneration of neurons	0.00084	APP, BCL2, CHGA, GRIN1, PTGS2, VEGFA	6
Neurological Disease	Parkinson's disease	0.00125	ANXA2, AP3B2, APP, ASNS, BAX, BCL2, CHGA, CPNE9, EWSR1, GABBR2, GADD45A, GRIN1, HLA-DOA, LARP1B (includes EG:55132), NDRG2, PKD1L2, PRDM16, PTGS2, RAB3C, SLC38A1, SYN1, SYN2, TGM2	23
Neurological Disease	neuropathy	0.00128	ANXA2, AP3B2, APP, ASNS, BAX, BCL2, BRE, CAV1, CHGA, CPNE9, CREB5, DDIT3, EGR1, EWSR1, FLJ35282, GABBR2, GADD45A, GRIN1, HLA-DOA, KIAA1274, LARP1B (includes EG:55132), LITAF, NDRG2, NEFM, PKD1L2, PRDM16, PTGS2, PVALB, RAB3C, RBKS, SGPP2, SLC1A4, SLC38A1, STAC, SYN1, SYN2, TGM2, VEGFA	38
Neurological Disease	cardiovascular disorder of cerebral cortex	0.00161	APP, PTGES	2
Neurological Disease	neuropathy of mammalia	0.00258	APP, BCL2, NEFM, PVALB	4
Neurological Disease	cardiovascular disorder of cerebrum	0.00265	APP, PSPN	2
Neurological Disease	delay in amyotrophic lateral sclerosis of mice	0.00265	BCL2, NEFM	2
Neurological Disease	damage of cerebral cortex	0.00394	PSPN, VEGFA	2
Neurological Disease	damage of hippocampus	0.00394	APP, VEGFA	2
Neurological Disease	progressive motor neuropathy	0.00405	ANXA2, AP3B2, APP, ASNS, BAX, BCL2, BRE, CHGA, CPNE9, CREB5, DDIT3, EGR1, EWSR1, FLJ35282, GABBR2, GADD45A, GRIN1, HLA-DOA, KIAA1274, LARP1B (includes EG:55132), NDRG2, NEFM, PKD1L2, PRDM16, PTGS2, PVALB, RAB3C, RBKS, SGPP2, SLC1A4, SLC38A1, STAC, SYN1, SYN2, TGM2	35
Neurological Disease	Rett syndrome	0.00526	DUSP4, FDXR, GRIN1, NELL2, TIAM1, XCL1, YWHAE	7
Neurological Disease	neurodegeneration of hippocampal neurons	0.00545	APP, GRIN1	2
Neurological Disease	damage of nervous tissue	0.0055	AADAT, TGM2, VEGFA	3
Neurological Disease	organismal abnormalities of cerebral cortex	0.00719	APP, PTGES	2
Neurological Disease	neurological disorder of body region	0.00885	CXCL12, FOSB, NEFM	3
siTAF15
Category	Functions Annotation	p-value	Molecules	# Molecules
Neurological Disease	dyskinesia	0.000306	APLP1, BCL11B, CTGF, EGR1, ETV4, ETV5, F3, FOS, FOSB, GAS5, GNAT2, GRIN1, HMOX1, MAFF, PKIA, PLOD2, PRKCB, SCN2B, SCOC, SOCS5, TSC22D3	21
Neurological Disease	edema of brain	0.000449	HMOX1, PLAT, VEGFA	3
Neurological Disease	glioma	0.000506	AKT3, ETV4, MAPK9, PRKCB, PTGS2, RAC1, TNC, VEGFA	8
Neurological Disease	Huntington's disease	0.000547	APLP1, BCL11B, CTGF, EGR1, ETV4, ETV5, F3, FOS, GAS5, GNAT2, GRIN1, HMOX1, MAFF, PKIA, PLOD2, PRKCB, SCN2B, SCOC, SOCS5, TSC22D3	20
Neurological Disease	leakage of blood-brain barrier	0.000852	PLAT, VEGFA	2
Neurological Disease	brain cancer	0.000906	AKT3, ETV4, FGFR1, MAPK9, PRKCB, PTGS2, RAC1, TERF1, TNC, VEGFA	10
Neurological Disease	neurodegeneration of neurons	0.00126	GRIN1, MAFG, PLAT, PTGS2, VEGFA	5
Neurological Disease	brain tumor	0.00158	AKT3, ETV4, FGFR1, MAPK9, PRKCB, PTGS2, RAC1, TNC, VEGFA	9
Neurological Disease	neurological disorder	0.00197	ABAT, AKAP12, AKT3, ANK1, APLP1, BCL11B, BEST1, BEX5, BGN, BRCA1, CACNA1G, CALCA, CCBP2, CCDC27, COLQ, CPLX1, CTGF, CXCL12, DOCK10, EBF2, EGR1, ETV4, ETV5, F3, FA2H, FGFR1, FNDC3A, FOS, FOSB, GAS5, GNAT2, GNB4, GPR56, GRIN1, HMOX1, IDH1, INA, KIAA1274, LUC7L3, MAFF, MAFG, MAP6, MAPK9, NEDD9, NQO1, PIK3IP1, PIK3R1, PKIA, PLAT, PLOD2, POLR3B, PPAPDC1A, PRKCB, PTGS2, RAC1, RARA, RBMS3, RHOC, SCN2B, …	74
Neurological Disease	neurodegeneration of hippocampal neurons	0.00291	GRIN1, PLAT	2
Neurological Disease	glioblastoma	0.00586	AKT3, PRKCB, TNC, VEGFA	4
Neurological Disease	seizures of rats	0.00609	GRIN1, PLAT	2
Neurological Disease	retinopathy	0.00697	BEST1, PRKCB, PTGS2, VEGFA	4
siFUS+siEWS+siTAF15
Category	Functions Annotation	p-value	Molecules	# Molecules
Neurological Disease	Usher syndrome type 1D	0.000589	CDH23, PCDH15	2
Neurological Disease	oligoastrocytoma	0.00561	ABL1, FKBP1A	2
Neurological Disease	dyskinesia	0.00579	B4GALT5, CTGF, CYCS (includes EG:54205), CYTH1, DTNA, EGR1, ETV4, ETV5, FOS, FOXG1, FOXP1, GPR83, GRIN2A, HSP90AA1, ID4, KCNQ2, MAFF, MYOM2, NAP1L5, PLOD2, PPM1B, PRKCB, PVALB, RCAN1, SCN4A, SCOC, SLC35D3, SYPL1, TCERG1, VPS13A	30
Neurological Disease	Huntington's disease	0.00703	B4GALT5, CTGF, CYCS (includes EG:54205), CYTH1, DTNA, EGR1, ETV4, ETV5, FOS, FOXG1, FOXP1, GPR83, GRIN2A, HSP90AA1, ID4, KCNQ2, MAFF, MYOM2, NAP1L5, PLOD2, PPM1B, PRKCB, PVALB, RCAN1, SCN4A, SCOC, SLC35D3, SYPL1, TCERG1	29
Neurological Disease	neurological disorder	0.0226	ABCC2, ABCC5, ABL1, ACTA2, AGPAT4, AK5, ALAS2, ANG, APTX, ARHGAP26, ATG7, ATP2C1, ATRX, B4GALT5, BAD, BCYRN1, BEX5, C20orf196, CAPZB, CAV1, CCNB1, CD36, CDH23, CERK, CLEC2D (includes EG:29121), CLN8, CREB5, CTGF, CTLA4, CYCS (includes EG:54205), CYTH1, DCDC5, DTNA, EGR1, EIF6, ELOVL2, ENC1, ERC1, ETV4, ETV5, EWSR1, FCGRT, FGF17, FGGY, FKBP1A, FOS, FOXG1, FOXK1, FOXP1, GAB1, GCM1, GLRA1, GLS2, GPR…	130
Neurological Disease	Myokymia with neonatal epilepsy	0.0243	KCNQ2	1
Neurological Disease	Usher Syndrome type 1F	0.0243	PCDH15	1
Neurological Disease	akinesia of rats	0.0243	OPRL1	1
Neurological Disease	ataxia with ocular apraxia 1 of humans	0.0243	APTX	1
Neurological Disease	choreaacanthocytosis	0.0243	VPS13A	1
Neurological Disease	delay in demyelination of spinal cord	0.0243	PLAT	1
Neurological Disease	diastematomyelia of mice	0.0243	GCM1	1
Neurological Disease	dystrophy of fiber tract	0.0243	ATG7	1
Neurological Disease	kindling of mice	0.0243	FOS	1
Neurological Disease	neuronal ceroid lipofuscinosis-8	0.0243	CLN8	1
Neurological Disease	neuronal ceroid liposuscinosis 8 northern epilepsy variant	0.0243	CLN8	1
