# Supplementary material for: Gene Expression Responses to FUS, EWS, and TAF15 Reduction and Stress Granule Sequestration Analyses Identifies FET-Protein Non-Redundant Functions
Source: PLoS One. 2012 Sep 25;7(9):e46251. doi: 10.1371/journal.pone.0046251 (PMC3457980; doi:10.1371/journal.pone.0046251)
Supplement: Table S11 — Comparison of DEGs and genes identified by CLIP by Hoell et al., 2011. (XLSX) [file pone.0046251.s018.xlsx]

## Sheet: Ark1
Differentially expressed genes (DEGs) also identified by CLIP analysis by Hoell et al. 2011
siFUS
PROBE_ID	SYMBOL	siFUS Average Signal	siFUS Average Signal (-background)	siFUS Detection p-value	siFUS PMA	si+ Control Average Signal	si+ Control Average Signal (-background)	si+ Control Detection p-value	si+ Control PMA	Ratio
ILMN_1756615	SMURF1	42.6395	14.6395	0.0421607	P	30.5131	2.51315	0.947299	A	5.82516		70 af 307
ILMN_2148360	ADAM10	43.7162	15.7162	0.0342556	P	32.5555	4.55547	0.752306	A	3.44997
ILMN_1777164	DIP2A	84.7742	56.7742	0.00131752	P	44.9867	16.9867	0.0197628	P	3.34228
ILMN_2322747	ARHGAP5	48.7131	20.713	0.0131752	P	35.5812	7.58125	0.330698	A	2.73214
ILMN_1653283	APP	63.2772	35.2772	0.00263505	P	41.1545	13.1545	0.0513834	M	2.68176
ILMN_1697448	TXNIP	117.212	89.2124	0	P	61.6567	33.6567	0.00395257	P	2.65066
ILMN_1806951	CSTF3	241.588	213.588	0	P	111.45	83.4497	0	P	2.55949
ILMN_1695354	BMF	63.565	35.565	0.00263505	P	42.2557	14.2557	0.0368906	P	2.49478
ILMN_1775931	EPHA3	73.0108	45.0108	0.00263505	P	46.4655	18.4655	0.0131752	P	2.43756
ILMN_1688160	WDR27	216.458	188.458	0	P	109.809	81.8089	0	P	2.30364
ILMN_1778662	DIP2A	206.669	178.669	0	P	106.898	78.8982	0	P	2.26455
ILMN_1747759	WSB1	177.592	149.592	0	P	95.5385	67.5385	0	P	2.21492
ILMN_1684694	ANK1	41.7691	13.7691	0.0487484	P	34.251	6.25105	0.509881	A	2.20268
ILMN_1662932	LCP1	55.9186	27.9186	0.00658761	P	40.8394	12.8394	0.057971	M	2.17445
ILMN_2376502	RHOBTB1	42.2732	14.2733	0.0474308	P	34.5921	6.59209	0.465086	A	2.16521
ILMN_1721758	ID4	52.3001	24.3001	0.00790514	P	39.5545	11.5544	0.0764163	A	2.10309
ILMN_2396691	AKAP9	47.0879	19.0879	0.0158103	P	37.1479	9.14787	0.194993	A	2.0866
ILMN_1686846	AKAP12	43.4695	15.4695	0.0382082	P	35.4179	7.41788	0.350461	A	2.08543
ILMN_2152422	MCART6	50.1881	22.1881	0.0105402	P	38.6887	10.6888	0.105402	A	2.07583
ILMN_1662488	MED23	56.0385	28.0385	0.00658761	P	41.681	13.681	0.0421607	P	2.04945
ILMN_2057389	PEX3	42.5246	14.5246	0.0434783	P	35.1568	7.15677	0.389987	A	2.02949
ILMN_1694847	TERF1	272.709	244.709	0	P	149.309	121.309	0	P	2.01723
ILMN_2149226	CAV1	195.739	167.739	0	P	111.239	83.2394	0	P	2.01515
ILMN_1665065	SERINC3	171.307	143.307	0	P	99.3401	71.3401	0	P	2.00878
ILMN_2322552	NCKAP1	485.714	457.714	0	P	256.528	228.528	0	P	2.00288
ILMN_1725773	DNAJC12	166.499	138.499	0	P	97.2132	69.2132	0	P	2.00104
ILMN_1795503	MCC	39.9857	11.9857	0.0685112	M	52.1282	24.1282	0.00658761	P	0.496752
ILMN_1697817	PANX1	43.7107	15.7107	0.0342556	P	59.6769	31.6769	0.00395257	P	0.495968
ILMN_1722812	GOSR2	38.5093	10.5093	0.118577	A	49.2284	21.2284	0.0105402	P	0.495059
ILMN_1810274	HOXB2	315.101	287.101	0	P	608.675	580.675	0	P	0.494426
ILMN_1756806	MCL1	81.065	53.065	0.00131752	P	135.575	107.575	0	P	0.493283
ILMN_2294653	PDE5A	37.8085	9.80854	0.155468	A	47.9314	19.9314	0.0118577	P	0.492115
ILMN_2296697	MAP3K3	35.0432	7.04318	0.405797	A	42.3481	14.3481	0.0355731	P	0.490879
ILMN_1685318	EN2	51.0052	23.0052	0.00922266	P	74.9455	46.9455	0	P	0.49004
ILMN_1675927	NEBL	35.4183	7.41833	0.358366	A	43.1726	15.1726	0.0316205	P	0.48893
ILMN_1771878	SUSD5	39.997	11.997	0.0685112	M	52.5489	24.5489	0.00658761	P	0.488699
ILMN_1679158	FAAH2	36.5079	8.50789	0.246377	A	45.4407	17.4407	0.0171278	P	0.487819
ILMN_1790801	RPS6KA2	36.8308	8.83083	0.226614	A	46.1038	18.1038	0.0144928	P	0.487788
ILMN_1695475	SEMA3C	36.6557	8.65572	0.238472	A	45.892	17.892	0.0144928	P	0.483777
ILMN_1791232	SPRED2	100.158	72.1576	0.00131752	P	178.24	150.24	0	P	0.480281
ILMN_1670695	BACH2	37.7902	9.79024	0.156785	A	48.3892	20.3892	0.0118577	P	0.480168
ILMN_1673119	AFF1	39.2495	11.2495	0.0895916	A	51.5226	23.5226	0.00790514	P	0.478243
ILMN_2171783	CPEB3	34.6904	6.6904	0.455863	A	42.0075	14.0075	0.0382082	P	0.47763
ILMN_2218068	RAB40A	36.5981	8.59807	0.241107	A	46.2362	18.2362	0.0144928	P	0.471484
ILMN_1727315	DENND1A	103.9	75.9001	0.00131752	P	191.534	163.534	0	P	0.464124
ILMN_1733050	SEC31B	37.1704	9.17036	0.200264	A	47.9761	19.9761	0.0118577	P	0.459067
ILMN_2179873	PHC3	46.4533	18.4533	0.0158103	P	69.0067	41.0067	0	P	0.450006
ILMN_1790659	GNL3	45.5361	17.5361	0.0210804	P	66.9837	38.9837	0.00263505	P	0.449832
ILMN_1774493	KLC2	34.1624	6.16238	0.516469	A	41.9301	13.9301	0.0382082	P	0.442378
ILMN_1692826	UNKL	78.1038	50.1038	0.00131752	P	142.463	114.463	0	P	0.437729
ILMN_1689057	PIK3R1	34.5802	6.58022	0.472991	A	43.2611	15.2611	0.0316205	P	0.431176
ILMN_1804945	ZNF667	34.3851	6.38507	0.495389	A	43.0636	15.0636	0.0316205	P	0.423875
ILMN_1666325	ALG10B	45.2322	17.2322	0.0237154	P	68.8568	40.8568	0	P	0.42177
ILMN_1675979	RBMS3	35.9851	7.98505	0.295125	A	46.9639	18.9639	0.0131752	P	0.421066
ILMN_1761456	ALG13	296.721	268.721	0	P	683.175	655.175	0	P	0.410151
ILMN_1668839	ACOX1	33.389	5.38897	0.625823	A	41.3861	13.3861	0.0461133	P	0.40258
ILMN_1692967	AXIN1	35.2015	7.20154	0.383399	A	45.9363	17.9363	0.0144928	P	0.401506
ILMN_2394264	UBTF	38.3888	10.3888	0.1278	A	53.9088	25.9088	0.00658761	P	0.400976
ILMN_1751040	RAB23	34.3635	6.36347	0.496706	A	44.2418	16.2418	0.0250329	P	0.391795
ILMN_1674975	MANEAL	33.6543	5.65433	0.59025	A	42.8431	14.8431	0.0329381	P	0.38094
ILMN_2252701	SLC6A9	33.7313	5.73128	0.582345	A	43.5156	15.5156	0.0316205	P	0.369388
ILMN_1784094	PRDM16	32.9772	4.97725	0.679842	A	41.5193	13.5193	0.0434783	P	0.36816
ILMN_1713161	USP16	34.9239	6.92388	0.422925	A	46.9256	18.9256	0.0131752	P	0.365847
ILMN_1716925	FSIP1	34.308	6.30802	0.504611	A	47.6183	19.6183	0.0118577	P	0.321538
ILMN_1790784	ZNF197	32.4113	4.41132	0.757576	A	41.807	13.807	0.0382082	P	0.319498
ILMN_1732672	AGPAT4	32.9826	4.98259	0.679842	A	47.8662	19.8662	0.0118577	P	0.250807
ILMN_2306066	FUS	61.2287	33.2287	0.00395257	P	177.397	149.397	0	P	0.222419
ILMN_1712112	RCAN1	36.6187	8.61874	0.241107	A	75.2669	47.2668	0	P	0.182342
ILMN_1762899	EGR1	108.715	80.7153	0	P	666.767	638.767	0	P	0.126361
ILMN_1739222	ETV5	40.0763	12.0763	0.0671937	M	167.96	139.96	0	P	0.086284
siEWS
PROBE_ID	SYMBOL	siEWS Average Signal	siEWS Average Signal (-background)	siEWS Detection p-value	siEWS PMA	si+ Control Average Signal	si+ Control Average Signal (-background)	si+ Control Detection p-value	si+ Control PMA	Ratio
ILMN_1727831	RAD51L1	41.6318	13.6318	0.0447958	P	30.9234	2.92341	0.923584	A	4.66298		75 af 407
ILMN_1811787	RNF139	41.6984	13.6984	0.0447958	P	32.0653	4.06532	0.802372	A	3.36957
ILMN_2048647	NBEA	41.7521	13.7521	0.0434783	P	32.5594	4.55939	0.752306	A	3.01622
ILMN_2376502	RHOBTB1	46.6894	18.6894	0.0144928	P	34.5921	6.59209	0.465086	A	2.83513
ILMN_1653670	CUL3	42.8529	14.8529	0.030303	P	33.6048	5.60476	0.594203	A	2.65005
ILMN_1653283	APP	62.791	34.791	0.00395257	P	41.1545	13.1545	0.0513834	M	2.6448
ILMN_1658805	BRE	42.9279	14.9279	0.030303	P	33.7774	5.77739	0.566535	A	2.58385
ILMN_1729905	GAL3ST1	51.3117	23.3117	0.00790514	P	37.0445	9.04452	0.202899	A	2.57744
ILMN_1810962	PTPRK	272.772	244.772	0	P	124.001	96.0012	0	P	2.54968
ILMN_1776333	TBCEL	42.9388	14.9388	0.030303	P	34.2909	6.29091	0.504611	A	2.37466
ILMN_1667374	C14orf149	95.0485	67.0485	0	P	56.3562	28.3562	0.00395257	P	2.36451
ILMN_1770087	MOCS2	41.8617	13.8617	0.0434783	P	33.8819	5.88188	0.555995	A	2.35669
ILMN_1775931	EPHA3	71.1856	43.1856	0.00131752	P	46.4655	18.4655	0.0131752	P	2.33872
ILMN_2404065	APP	950.271	922.271	0	P	422.513	394.513	0	P	2.33774
ILMN_2122300	DNAL1	43.6611	15.6611	0.027668	P	34.8902	6.89017	0.42029	A	2.27296
ILMN_1766000	PM20D2	209.503	181.503	0	P	108.665	80.6646	0	P	2.25009
ILMN_1796751	KIAA1274	42.7451	14.7451	0.030303	P	34.5606	6.56056	0.469038	A	2.24753
ILMN_1762002	CSTF3	938.349	910.349	0	P	436.7	408.7	0	P	2.22743
ILMN_2404063	APP	615.5	587.5	0	P	294.989	266.989	0	P	2.20047
ILMN_1774127	STAC	44.5286	16.5286	0.0210804	P	35.5403	7.54034	0.334651	A	2.19202
ILMN_1652826	LRRC17	105.672	77.6724	0	P	64.6775	36.6775	0.00395257	P	2.11771
ILMN_1806951	CSTF3	203.659	175.659	0	P	111.45	83.4497	0	P	2.10496
ILMN_1726421	METTL9	152.809	124.809	0	P	87.7616	59.7616	0	P	2.08845
ILMN_1664833	MRPL50	731.649	703.649	0	P	365.48	337.48	0	P	2.08501
ILMN_1721758	ID4	51.7014	23.7014	0.00790514	P	39.5545	11.5544	0.0764163	A	2.05128
ILMN_1760129	EHMT1	52.096	24.096	0.00790514	P	39.9166	11.9167	0.0724638	A	2.02205
ILMN_2149226	CAV1	195.499	167.499	0	P	111.239	83.2394	0	P	2.01226
ILMN_1777096	TDG	961.976	933.976	0	P	1897.07	1869.07	0	P	0.499701
ILMN_1769517	PRKDC	736.541	708.541	0	P	1450.42	1422.42	0	P	0.498125
ILMN_1796417	ASNS	2023.43	1995.43	0	P	4045.2	4017.2	0	P	0.496723
ILMN_1794306	USP28	34.9104	6.91044	0.45718	A	41.9644	13.9644	0.0382082	P	0.494863
ILMN_1656628	WDR4	757.055	729.055	0	P	1508.03	1480.03	0	P	0.492594
ILMN_1667213	DFFA	520.675	492.675	0	P	1034.59	1006.59	0	P	0.489448
ILMN_2374865	ATF3	354.217	326.217	0	P	695.13	667.13	0	P	0.488985
ILMN_1803882	VEGFA	45.6921	17.6921	0.0184453	P	64.2417	36.2417	0.00395257	P	0.48817
ILMN_1673936	KHSRP	519.327	491.327	0	P	1035.09	1007.09	0	P	0.487869
ILMN_1702691	TNFAIP3	49.0816	21.0816	0.0118577	P	71.6127	43.6127	0	P	0.483381
ILMN_1711899	ANXA2	98.5142	70.5142	0	P	173.952	145.952	0	P	0.483132
ILMN_2246956	BCL2	100.244	72.2442	0	P	177.665	149.665	0	P	0.482705
ILMN_1727041	EWSR1	982.266	954.266	0	P	2009.8	1981.8	0	P	0.481516
ILMN_1652638	LRRC58	68.8128	40.8128	0.00263505	P	112.982	84.9818	0	P	0.480254
ILMN_2412927	GMPPB	260.461	232.461	0	P	512.985	484.985	0	P	0.479316
ILMN_1693014	CEBPB	964.731	936.731	0	P	1985.29	1957.29	0	P	0.478586
ILMN_1795429	VCL	1028.58	1000.58	0	P	2133.42	2105.42	0	P	0.475242
ILMN_1770515	UBE2V2	721.778	693.778	0	P	1492.57	1464.57	0	P	0.473707
ILMN_1652024	CSNK1G3	152.009	124.009	0	P	290.759	262.759	0	P	0.47195
ILMN_2361737	TRIM36	47.6368	19.6368	0.0118577	P	69.6587	41.6587	0	P	0.471373
ILMN_1661325	PKP4	64.6255	36.6255	0.00395257	P	106.451	78.4508	0	P	0.466859
ILMN_1686237	CBX2	36.5301	8.5301	0.27141	A	46.281	18.281	0.0144928	P	0.46661
ILMN_1810797	WASF3	149.137	121.138	0	P	289.633	261.633	0	P	0.463005
ILMN_2098446	PMAIP1	240.141	212.141	0	P	490.039	462.039	0	P	0.459141
ILMN_1781182	RAB43	35.1284	7.12837	0.426878	A	43.7848	15.7848	0.030303	P	0.451597
ILMN_1717934	SYT11	75.2972	47.2972	0.00131752	P	133.787	105.787	0	P	0.4471
ILMN_1686989	INSIG1	75.0861	47.0861	0.00131752	P	134.485	106.485	0	P	0.442185
ILMN_1698715	NHLRC2	77.2108	49.2107	0.00131752	P	139.91	111.91	0	P	0.439735
ILMN_1811195	ZNF211	73.093	45.093	0.00131752	P	131.399	103.399	0	P	0.436105
ILMN_1687546	HSP90AA1	65.0931	37.0931	0.00395257	P	116.366	88.366	0	P	0.419767
ILMN_1688573	CREB5	33.9286	5.92859	0.57444	A	42.3581	14.3581	0.0355731	P	0.412908
ILMN_1771462	RPL36	123.55	95.5499	0	P	260.661	232.661	0	P	0.410683
ILMN_1687998	LPGAT1	49.6381	21.6381	0.00922266	P	80.9222	52.9222	0	P	0.408866
ILMN_1697735	EWSR1	616.402	588.402	0	P	1490.02	1462.02	0	P	0.402458
ILMN_2112460	MAD2L1	55.8073	27.8073	0.00527009	P	97.3398	69.3398	0	P	0.40103
ILMN_2406892	C19orf2	291.211	263.211	0	P	693.938	665.938	0	P	0.395248
ILMN_1713161	USP16	35.419	7.41896	0.400527	A	46.9256	18.9256	0.0131752	P	0.392006
ILMN_1807535	YWHAE	83.0259	55.0259	0.00131752	P	169.745	141.745	0	P	0.388204
ILMN_2413527	VCL	111.675	83.6748	0	P	243.774	215.774	0	P	0.387788
ILMN_2266948	SLC38A1	58.2427	30.2427	0.00395257	P	110.079	82.0786	0	P	0.36846
ILMN_1867659	ONECUT2	35.0361	7.03606	0.438735	A	47.333	19.333	0.0118577	P	0.363941
ILMN_1689057	PIK3R1	33.2733	5.27334	0.657444	A	43.2611	15.2611	0.0316205	P	0.345541
ILMN_1784822	PPP1R3F	80.5732	52.5732	0.00131752	P	194.401	166.401	0	P	0.315943
ILMN_1782331	TDG	156.718	128.718	0	P	454.459	426.459	0	P	0.30183
ILMN_2375879	VEGFA	70.3075	42.3075	0.00131752	P	171.1	143.1	0	P	0.295651
ILMN_1655229	SLC7A11	36.5929	8.59292	0.26614	A	60.0533	32.0533	0.00395257	P	0.268082
ILMN_1712112	RCAN1	38.4695	10.4695	0.125165	A	75.2669	47.2668	0	P	0.221497
ILMN_1739222	ETV5	47.7709	19.7709	0.0118577	P	167.96	139.96	0	P	0.141261
siTAF15
PROBE_ID	SYMBOL	siTAF15 Average Signal	siTAF15 Average Signal (-background)	siTAF15 Detection p-value	siTAF15 PMA	si+ Control Average Signal	si+ Control Average Signal (-background)	si+ Control Detection p-value	si+ Control PMA	Ratio
ILMN_1693333	TMEM19	44.9256	16.9256	0.0250329	P	32.8403	4.84028	0.71278	A	3.49682
ILMN_1686846	AKAP12	48.1673	20.1673	0.0158103	P	35.4179	7.41788	0.350461	A	2.71875		30 af 293
ILMN_1806951	CSTF3	237.268	209.268	0	P	111.45	83.4497	0	P	2.50772
ILMN_2322747	ARHGAP5	46.9235	18.9235	0.0210804	P	35.5812	7.58125	0.330698	A	2.4961
ILMN_1754378	GAS5	46.2492	18.2492	0.0223979	P	35.9226	7.92263	0.299078	A	2.30343
ILMN_1796751	KIAA1274	42.7892	14.7892	0.0342556	P	34.5606	6.56056	0.469038	A	2.25426
ILMN_1762002	CSTF3	944.849	916.849	0	P	436.7	408.7	0	P	2.24333
ILMN_2151368	NOL12	658.95	630.95	0	P	310.235	282.235	0	P	2.23555
ILMN_1763605	DIDO1	502.993	474.993	0	P	241.811	213.811	0	P	2.22155
ILMN_2350970	SOCS5	44.8893	16.8893	0.0250329	P	35.7073	7.70732	0.317523	A	2.19133
ILMN_1716832	ACSF3	48.37	20.37	0.0158103	P	37.4646	9.46465	0.167325	A	2.15221
ILMN_1705111	FNDC3A	180.482	152.482	0	P	102.505	74.5055	0	P	2.04659
ILMN_1689336	HOXA10	610.407	582.407	0	P	315.54	287.54	0	P	2.02548
ILMN_1695041	GATA6	46.1063	18.1063	0.0223979	P	36.9519	8.95192	0.210804	A	2.02261
ILMN_1697652	PLEKHB2	86.5699	58.5699	0.00131752	P	146.485	118.485	0	P	0.494323
ILMN_1768115	TSPAN12	79.0928	51.0928	0.00131752	P	132.226	104.226	0	P	0.49021
ILMN_1773742	DNAJB9	149.498	121.498	0	P	276.866	248.866	0	P	0.488207
ILMN_1803882	VEGFA	45.6699	17.6699	0.0237154	P	64.2417	36.2417	0.00395257	P	0.487556
ILMN_1773696	RGMB	36.0617	8.06166	0.314888	A	44.5447	16.5447	0.0223979	P	0.487265
ILMN_1667707	SPCS3	83.8177	55.8177	0.00131752	P	143.106	115.106	0	P	0.484926
ILMN_1659206	RARA	131.018	103.018	0	P	240.879	212.879	0	P	0.483925
ILMN_1668986	PRELID2	35.2339	7.23394	0.401844	A	43.6748	15.6748	0.0316205	P	0.461501
ILMN_1678707	TAF15	1187.83	1159.83	0	P	2577.46	2549.46	0	P	0.454934
ILMN_1757130	AKT3	34.1701	6.17015	0.521739	A	41.571	13.571	0.0434783	P	0.454658
ILMN_1752008	OTUD1	35.9678	7.96775	0.322793	A	45.5333	17.5333	0.0158103	P	0.454435
ILMN_1781356	TSC22D3	41.8079	13.8079	0.0447958	P	60.9542	32.9542	0.00395257	P	0.419004
ILMN_2402131	TAF15	76.5272	48.5273	0.00131752	P	144.508	116.508	0	P	0.416514
ILMN_1655229	SLC7A11	38.9764	10.9764	0.100132	A	60.0533	32.0533	0.00395257	P	0.342441
ILMN_1722718	BMP2	61.8104	33.8104	0.00395257	P	141.542	113.542	0	P	0.297778
ILMN_1771065	BRCA1	33.5106	5.51062	0.613966	A	46.6605	18.6605	0.0131752	P	0.295309
